# Supplementary material for: Stage Shifting by Modifying the Determinants of Breast Cancer Stage at Diagnosis: A Simulation Study
Source: Cancers (Basel). 2024 Mar 19;16(6):1201. doi: 10.3390/cancers16061201 (PMC10969221; doi:10.3390/cancers16061201)
Supplement: Supplementary file 1 [file cancers-16-01201-s001.zip › Supplementary Table S1.pdf]

Table S1. Data Dictionary.

| <b>Variables</b>                         | <b>Description</b>                                                                                                                                                                                                                                                                                                                                                                                                                                                                                                                                        | <b>Coding</b>                                     |
|------------------------------------------|-----------------------------------------------------------------------------------------------------------------------------------------------------------------------------------------------------------------------------------------------------------------------------------------------------------------------------------------------------------------------------------------------------------------------------------------------------------------------------------------------------------------------------------------------------------|---------------------------------------------------|
| Total dietary energy intake              | Baseline total dietary kcal intake                                                                                                                                                                                                                                                                                                                                                                                                                                                                                                                        | Continuous.                                       |
| Total dietary protein intake             | Daily protein intake in g/day                                                                                                                                                                                                                                                                                                                                                                                                                                                                                                                             | Continuous                                        |
| Ever been pregnant                       | Have you ever been pregnant?                                                                                                                                                                                                                                                                                                                                                                                                                                                                                                                              | 1: yes; 0: no                                     |
| Spend in the sun 11 am-4 pm, June-August | During this past June through August, on a typical day outdoors, approximately how much time did you spend in the sun between 11am and 4pm?                                                                                                                                                                                                                                                                                                                                                                                                               | 1: more than 1 hour per day, 0: less than 1 hour. |
| Current stressful situations             | <p>Stress: Is your current situation one of ?</p> <ol style="list-style-type: none"> <li>1) Your work around the home is not appreciated.</li> <li>2) Your friends are a bad influence.</li> <li>3) You would like to move but can't.</li> <li>4) Your neighborhood or community is too noisy or polluted.</li> <li>5) You have a parent, a child or a partner who is in very bad health and may die.</li> <li>6) Someone in your family has an alcohol, drug, or gambling problem.</li> <li>7) People are too critical of you or what you do.</li> </ol> | 1: yes; 0: no                                     |
| Birth control pills use                  | Have you ever taken birth control pills for any reason? Do not include birth control                                                                                                                                                                                                                                                                                                                                                                                                                                                                      | 1:yes; 0: no                                      |
