# Supplementary material for: Stage Shifting by Modifying the Determinants of Breast Cancer Stage at Diagnosis: A Simulation Study
Source: Cancers (Basel). 2024 Mar 19;16(6):1201. doi: 10.3390/cancers16061201 (PMC10969221; doi:10.3390/cancers16061201)
Supplement: Supplementary file 1 [file cancers-16-01201-s001.zip › Supplementary Table S3.pdf]

Table S3. Comparison of summary statistics between the observed data and simulated data for all of the variables included in the final multivariable partial proportional odds regression model for the real data analysis.

| Variables                                                        | Summary Statistics                |           |                                     |           |
|------------------------------------------------------------------|-----------------------------------|-----------|-------------------------------------|-----------|
|                                                                  | Observed data (sample size = 492) |           | Simulated data (sample Size = 1000) |           |
| <b>Continuous variables</b>                                      | <b>Mean</b>                       | <b>SD</b> | <b>Mean</b>                         | <b>SD</b> |
| Age at cancer diagnosis (years)                                  | 59.77                             | 9.93      | 60.53                               | 9.6       |
| Time to health center (minutes in log scale)                     | 1.96                              | 0.94      | 1.2                                 | 0.73      |
| Elixhauser comorbidity index                                     | 0.88                              | 1.13      | 0.78                                | 0.93      |
| Total dietary energy intake* (kcal/day)                          | 1605.46                           | 576.53    | 1605.5                              | 561.04    |
| Total dietary protein intake* (g/day)                            | 63.76                             | 25.04     | 64.41                               | 24.41     |
| <b>Binary variables</b>                                          | <b>N</b>                          | <b>%</b>  | <b>N</b>                            | <b>%</b>  |
| Family history of breast cancer (yes)                            | 89                                | 18.01     | 177                                 | 17.7      |
| Ever been pregnant* (yes)                                        | 444                               | 90.2      | 902                                 | 90.2      |
| Birth control pills use* (yes)                                   | 427                               | 86.8      | 877                                 | 87.7      |
| Ever had mammogram* (yes)                                        | 409                               | 83.1      | 829                                 | 82.9      |
| Smoked at least 100 cigarettes in your life? (yes)               | 280                               | 57        | 543                                 | 54.3      |
| Spend in the sun 11 a.m. to 4 p.m.,<br>June – August* (< 1 hour) | 248                               | 50.4      | 504                                 | 50.4      |
| Current stressful situations* ( $\geq 1$ )                       | 263                               | 53.5      | 527                                 | 52.7      |
| <b>Categorical variables</b>                                     | <b>N</b>                          | <b>%</b>  | <b>N</b>                            | <b>%</b>  |
| Household income                                                 |                                   |           |                                     |           |
| < \$50 K                                                         | 192                               | 39        | 384                                 | 38.4      |
| \$50 - \$100 K                                                   | 201                               | 41        | 426                                 | 42.6      |
| > \$100 K                                                        | 99                                | 20        | 190                                 | 19        |
| Cancer stages*                                                   |                                   |           |                                     |           |
| Stage I                                                          | 253                               | 51.4      | 524                                 | 52.4      |
| Stage II                                                         | 180                               | 36.6      | 334                                 | 33.4      |
| Stages III & IV                                                  | 59                                | 12        | 142                                 | 14.2      |

\* included in simulation study
