# Supplementary material for: Stage Shifting by Modifying the Determinants of Breast Cancer Stage at Diagnosis: A Simulation Study
Source: Cancers (Basel). 2024 Mar 19;16(6):1201. doi: 10.3390/cancers16061201 (PMC10969221; doi:10.3390/cancers16061201)
Supplement: Supplementary file 1 [file cancers-16-01201-s001.zip › Supplementary Table S4.pdf]

R code for simulation study

#Program name: predict\_y

# Program description: R code to calculate log odds cancer stages and convert to the probability of diagnosing in the stages I, II and III & IV using inv\_logit function and finally the proportion #of stages of the cancer.

# Inputs a simulated data matrix (simulatedData) with exactly 14 columns (screened by Wang et al, 2022\*) and the values of the regression parameters estimated by Wang et al, 2022.

# Output is proportion of the predictive stages based on the probability of diagnosing in the #stages I, II and III & IV using inv\_logit function.

# Project name: Catching cancer when it is small

# Project Scientists: Gyandendra Pokharel and Karen Kopciuk

# Author: written by Gyanendra Pokharel, Winnipeg

# Initial creation date: August 2019, last edit: March 2023

# Written for R version 4.2.2, Operating system: any

# Here are parts of this function code which shows sequential structure, line and space delimiters, and # descriptions of input/output for a step

# Logit function

```
inv_logit <- function(logOdds){ #Input: log odds and output: stage
  probability
  pi <- exp(logOdds)/(1 + exp(logOdds))
  return(pi)
}
```

# Simulate the response (proportions of breast cancer stages)

```
predict.y <-function(betaP0,betaPP0,simulatedData,beta0,sig){
```

#initialize the stage probabilities.

```
pi1 =pi2to3=0.0
pi2=pi3to3 =0.0
pi3=0.0
```

#create a matrix of parameter values

```
beta00 <-data.frame(matrix(c("beta02","beta03",beta0),nrow=2,byrow=F))
colnames(beta00) <- c("Variables","estimates")
beta <-data.frame(rbind(betaP0,beta00))
```

#extract variables satisfying P0 and PP0 assumptions from the simulated input.

```
dataP0 <- simulatedData[,match(betaP0$Variables,colnames(simulatedData))]
dataPP0 <- simulatedData[,match(betaPP0$Variables,colnames(simulatedData))]
```

```

# calculate the contribution of input variables and parameters for both P0
and PP0 assumptions

covariateP0 <- as.numeric(t(betaP0[,2]))%*%t(dataP0)
covariatePP01 <- as.numeric(t(betaPP0[,2]))%*%t(dataPP0)
covariatePP02 <- as.numeric(t(betaPP0[,3]))%*%t(dataPP0)

# Sample random error from normal distribution with mean 0 and standard
devaiation sigma.

noise<-rnorm(1,0,sig)

# Calculate log odds

logOdds1 <- (as.numeric(beta0[1]))+(covariateP0+covariatePP01+noise))
logOdds2 <- (as.numeric(beta0[2]))+(covariateP0+covariatePP02+noise))

# Calculate cumulative probabilities using inv_logit() function defined
# above

pi2to3 <-inv_logit(logOdds1)
pi3to3 <-inv_logit(logOdds2)

# Calculate individual stage probabilities

pi1 <-1-pi2to3
pi2 <-pi2to3-pi3to3
pi3 <-pi3to3

#Sample stages from (1,2,3) using the probability of stages.

y <- c()
for (i in 1:nrow(simulatedData)){
  y[i] <- sample(
    x = c(1,2,3),
    size = 1,
    replace=T,
    prob = c(pi1[i], pi2[i], pi3[i]))
}

# Find the number of individuals in each stages and convert to the
proportion.
n.y <- table(y)
p.y <-table(y)/nrow(simulatedData)

# cbind and return parameter values,individual stages, and predictive stages.

predict<-cbind(n.y,p.y)
data.out <-list(beta,y,predict)
return(data.out)
}

```

\*Wang Q, Aktary ML, Spinelli JJ, Shack L, Robson PJ, Kopciuk KA. Pre-diagnosis lifestyle, health history and psychosocial factors associated with stage at breast cancer diagnosis – Potential targets to shift stage earlier. *Cancer Epidemiology*. 2022;78:102152.
